# Supplementary material
Source: Research Square preprint supplement (doi:10.21203/rs.3.rs-8987244/v1)
Supplement: Supplementary file 1 [file cdb831f8500b9e7b5f706b1b.docx]

Supplementary Materials for

**Integrated Multi-omics Reveals Key Molecular Drivers and Therapeutic Strategies in a Spontaneous Cutaneous Squamous Cell Carcinoma Model of Macaques**

Pan *et al*.

Correspondence author: heyonghan@mail.kiz.ac.cn;

lvlongbao@mail.kiz.ac.cn

**This PDF file includes:**

Figures. S1 to S8

Tables S1 to S4

Uncropped Western blots

Abbreviations used in this article

**Supplementary Figures and Legends**


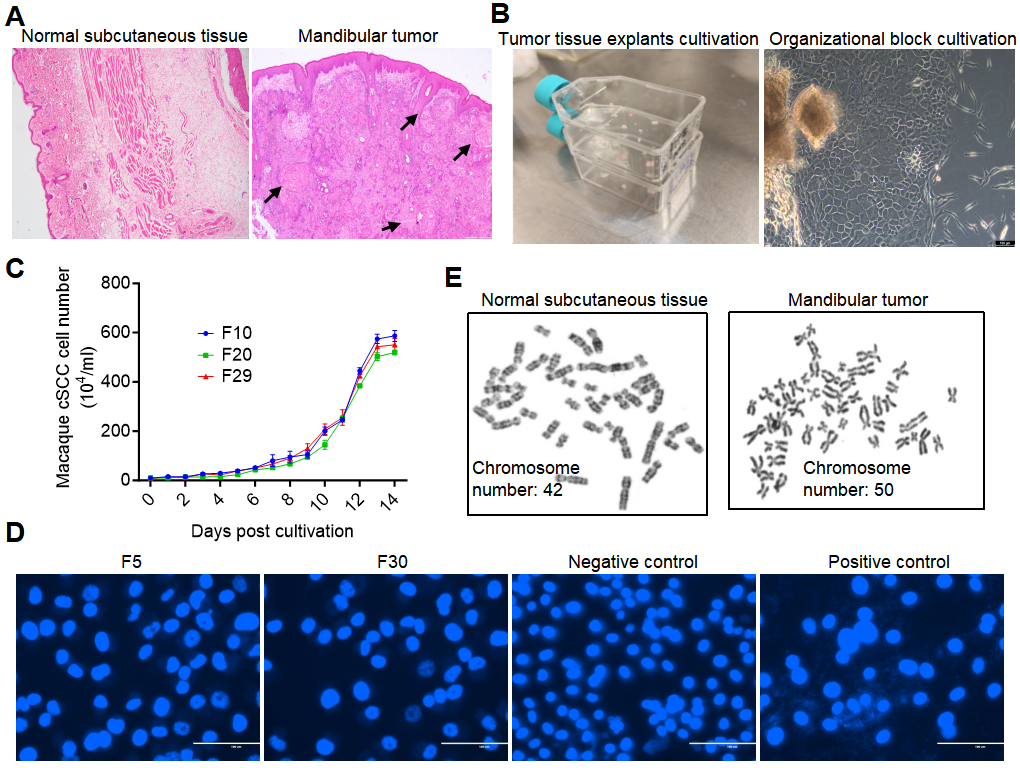


**Fig. S1. Features of spontaneous cSCC and isolated cells.** (**A**) H&E staining of skin and subcutaneous tissues (SST) and mandibular tumor. Black arrow indicates keratin pearl, a characteristic feature of squamous cell carcinoma. Scale bar: 100 μm. 4X.(**B**) Isolation and cultivation of tumor cells.(**C**) Growth curve of cSCC cells.(**D**)Mycoplasma detection in F5 and F30 generations of cSCC cells. Negative and Positive controls are also shown.(**E**) Representative karyotypic analysis of normal epithelial cells from rhesus (diploid chromosome number: 42) and karyotypic aberrations in primary tumor cell from rhesus spontaneous cSCC lesions (chromosome counts: 50).


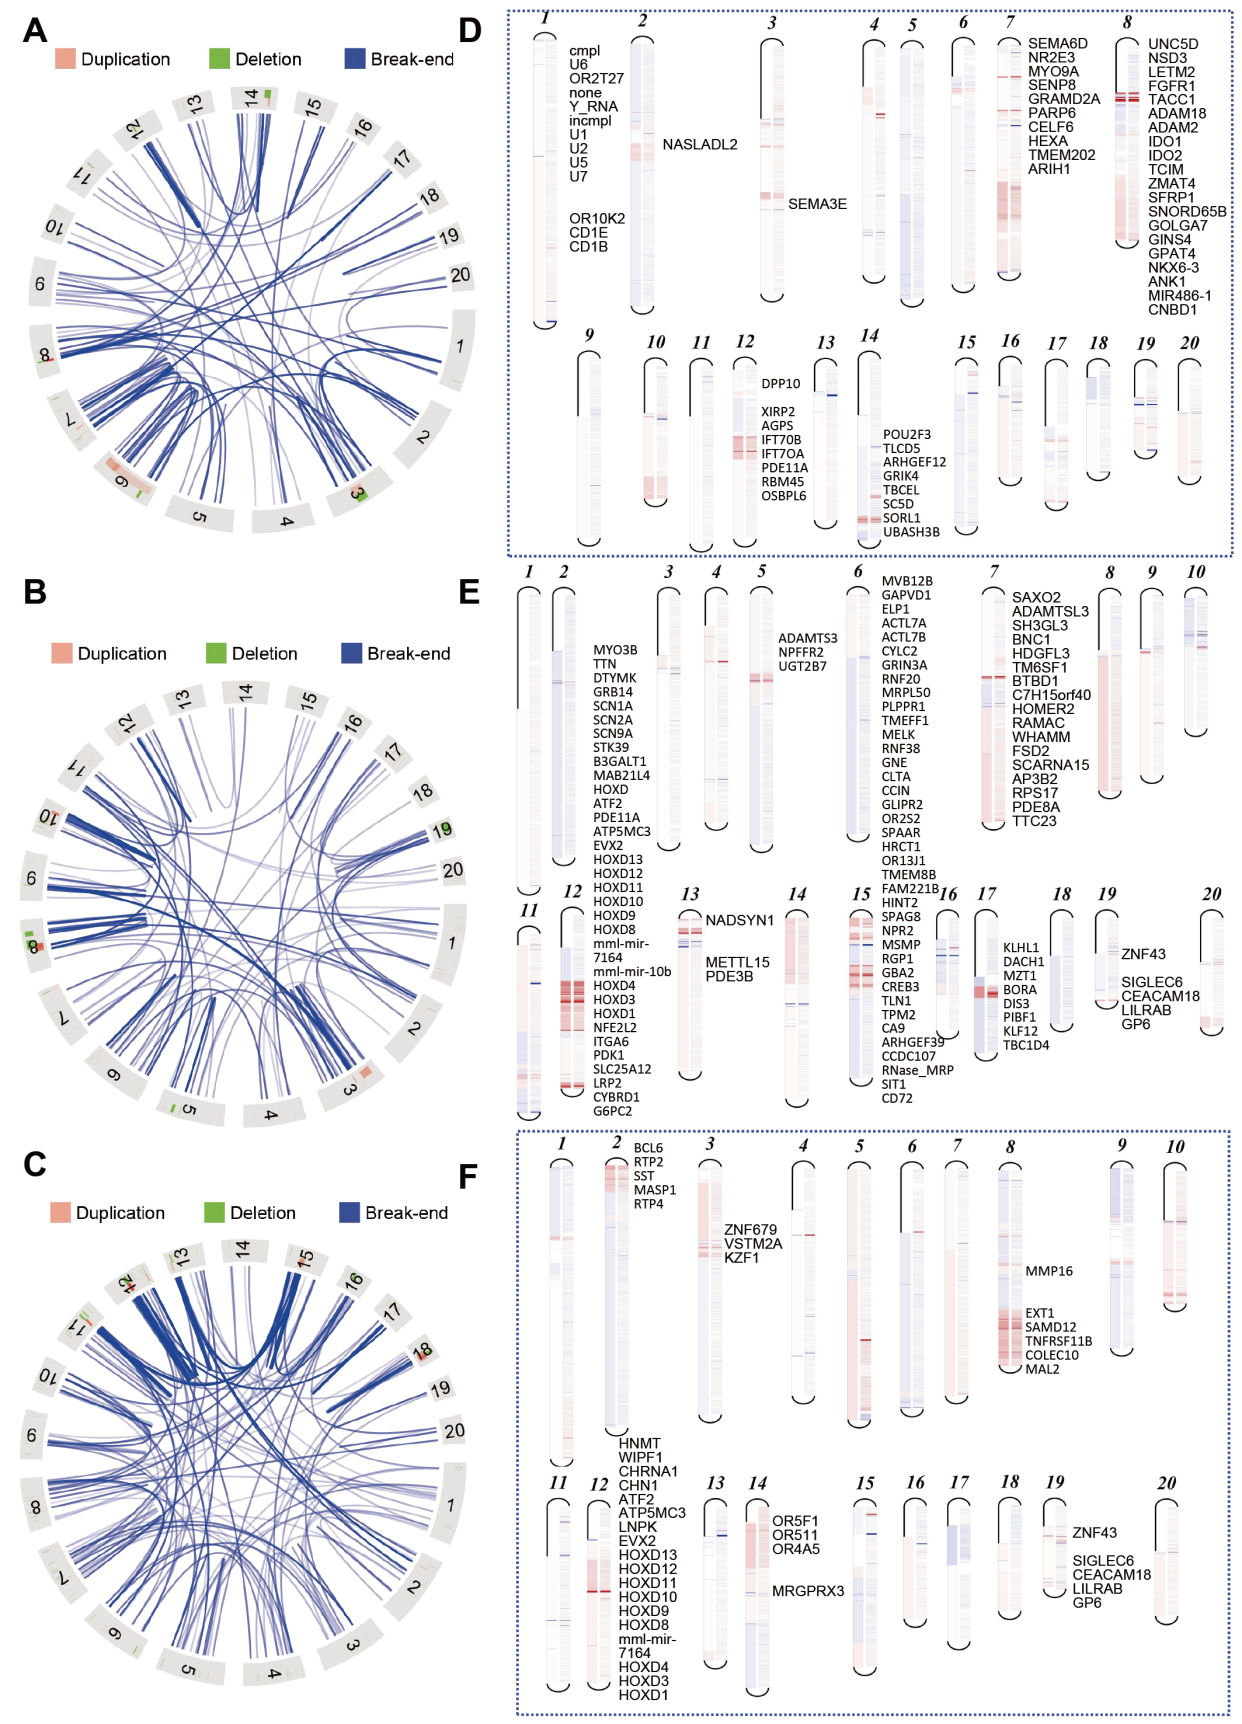


**Fig. S2. Features of spontaneous cSCC and isolated cells.** (**A** to **C**) Circos plots of large-scale structural variations in cSCC genomes. The plot depicts pervasive translocations and inversions across three cSCC tissue samples (CA-11454, CA-14422, CA-14397). (**D** to **F**) Chromosome-level copy number variation (CNV) profiles of cSCC samples. The profiles reveal widespread genomic imbalances, with recurrent copy number gains on chromosome 8 evident across tumor samples (CA-11454, CA-14397, CA-14422).


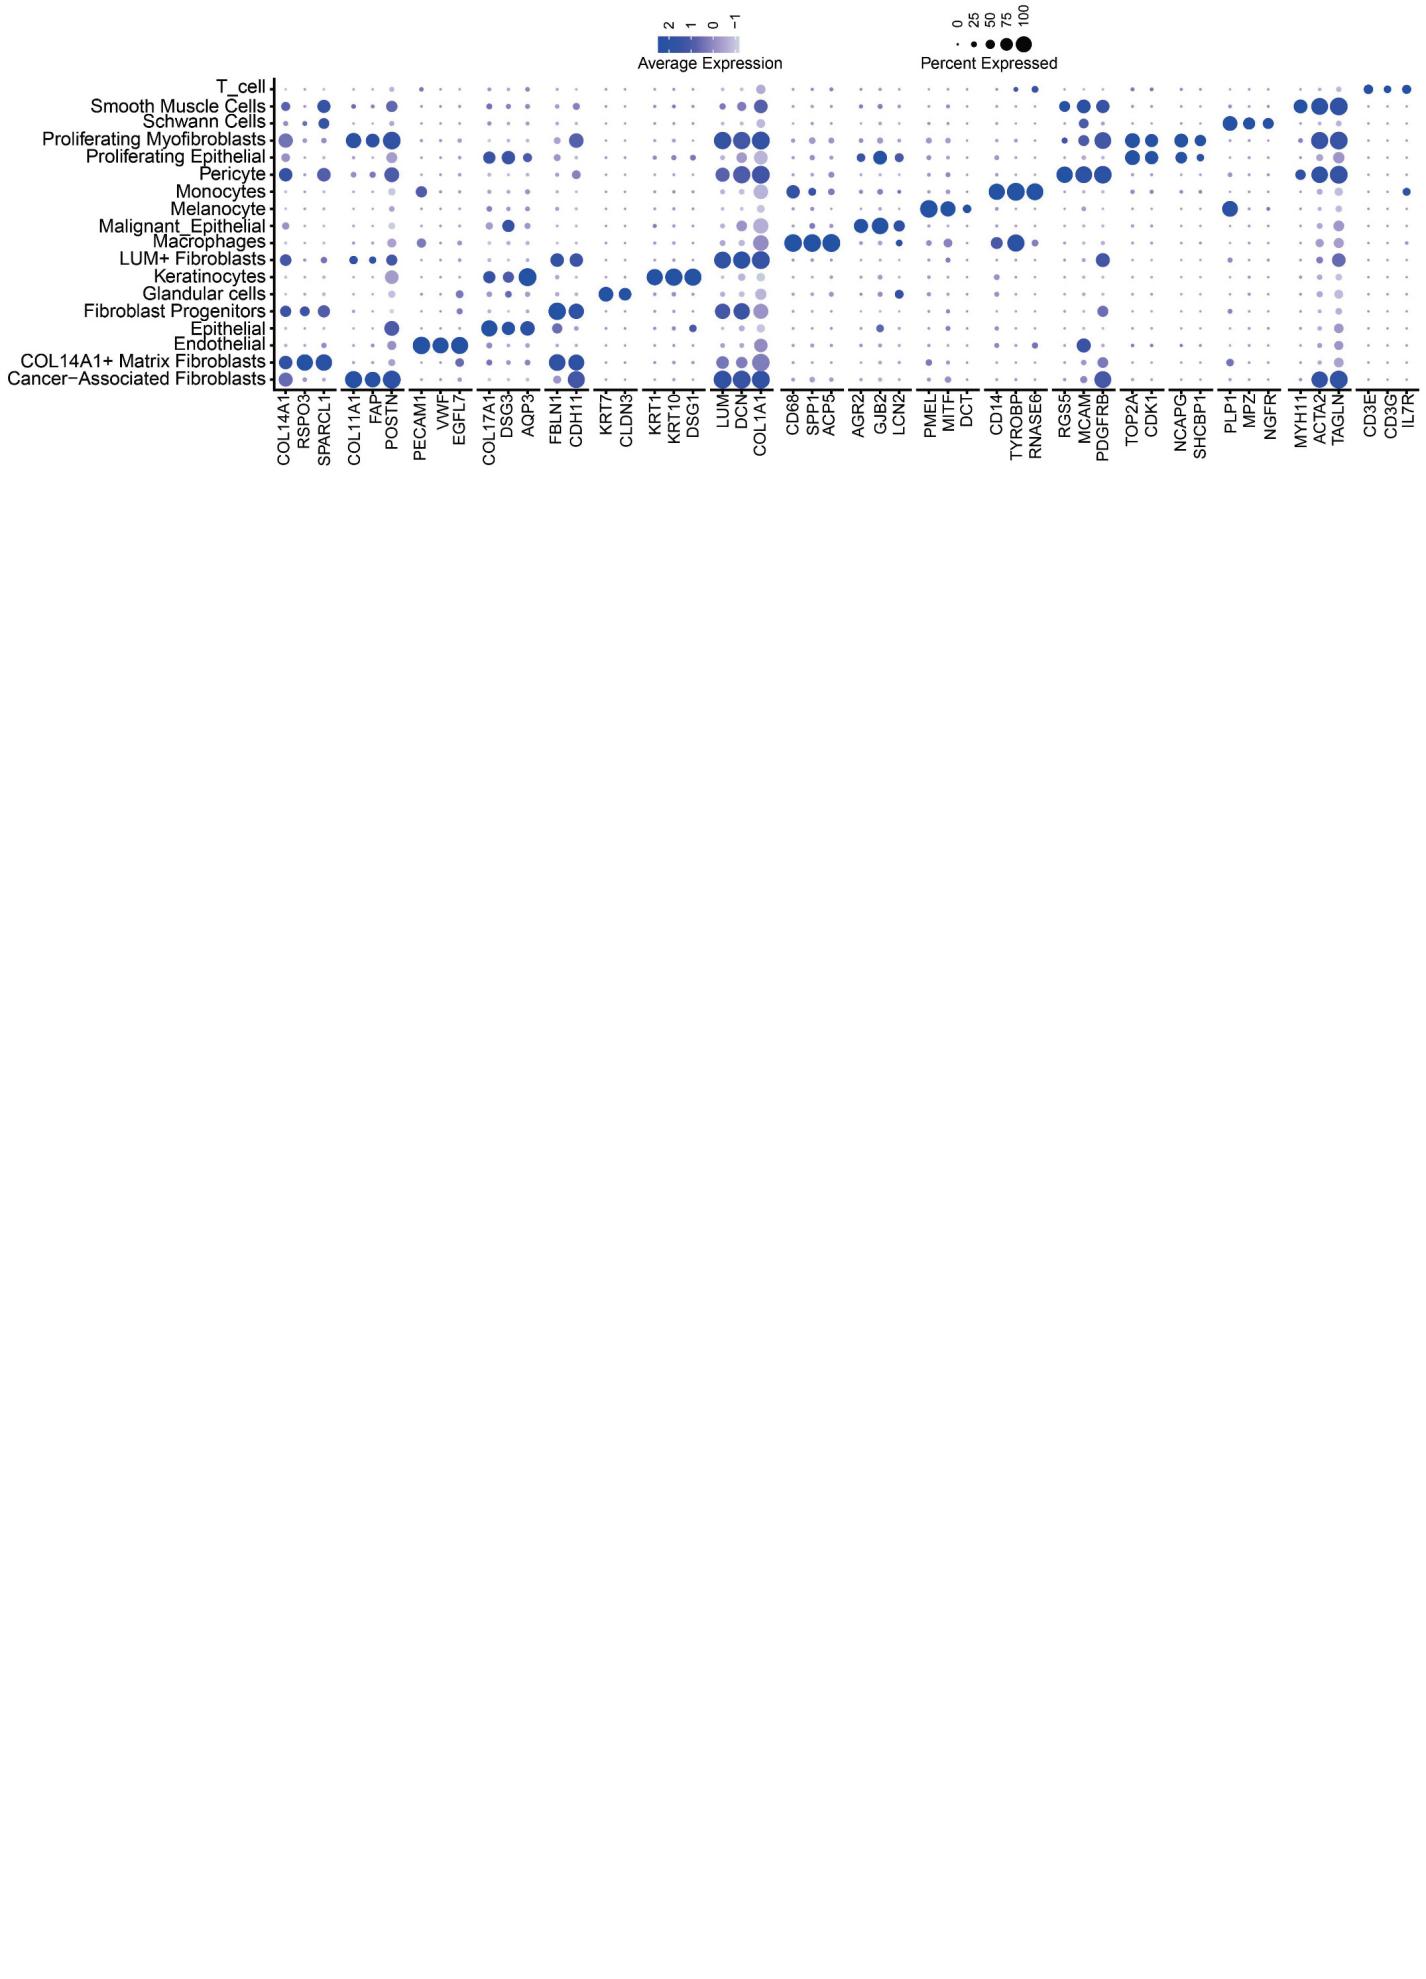


**Fig. S3. Results of tumor single-cell transcriptome sequencing analysis.** Bubble plot showing major cell populations and their canonical marker gene expression.


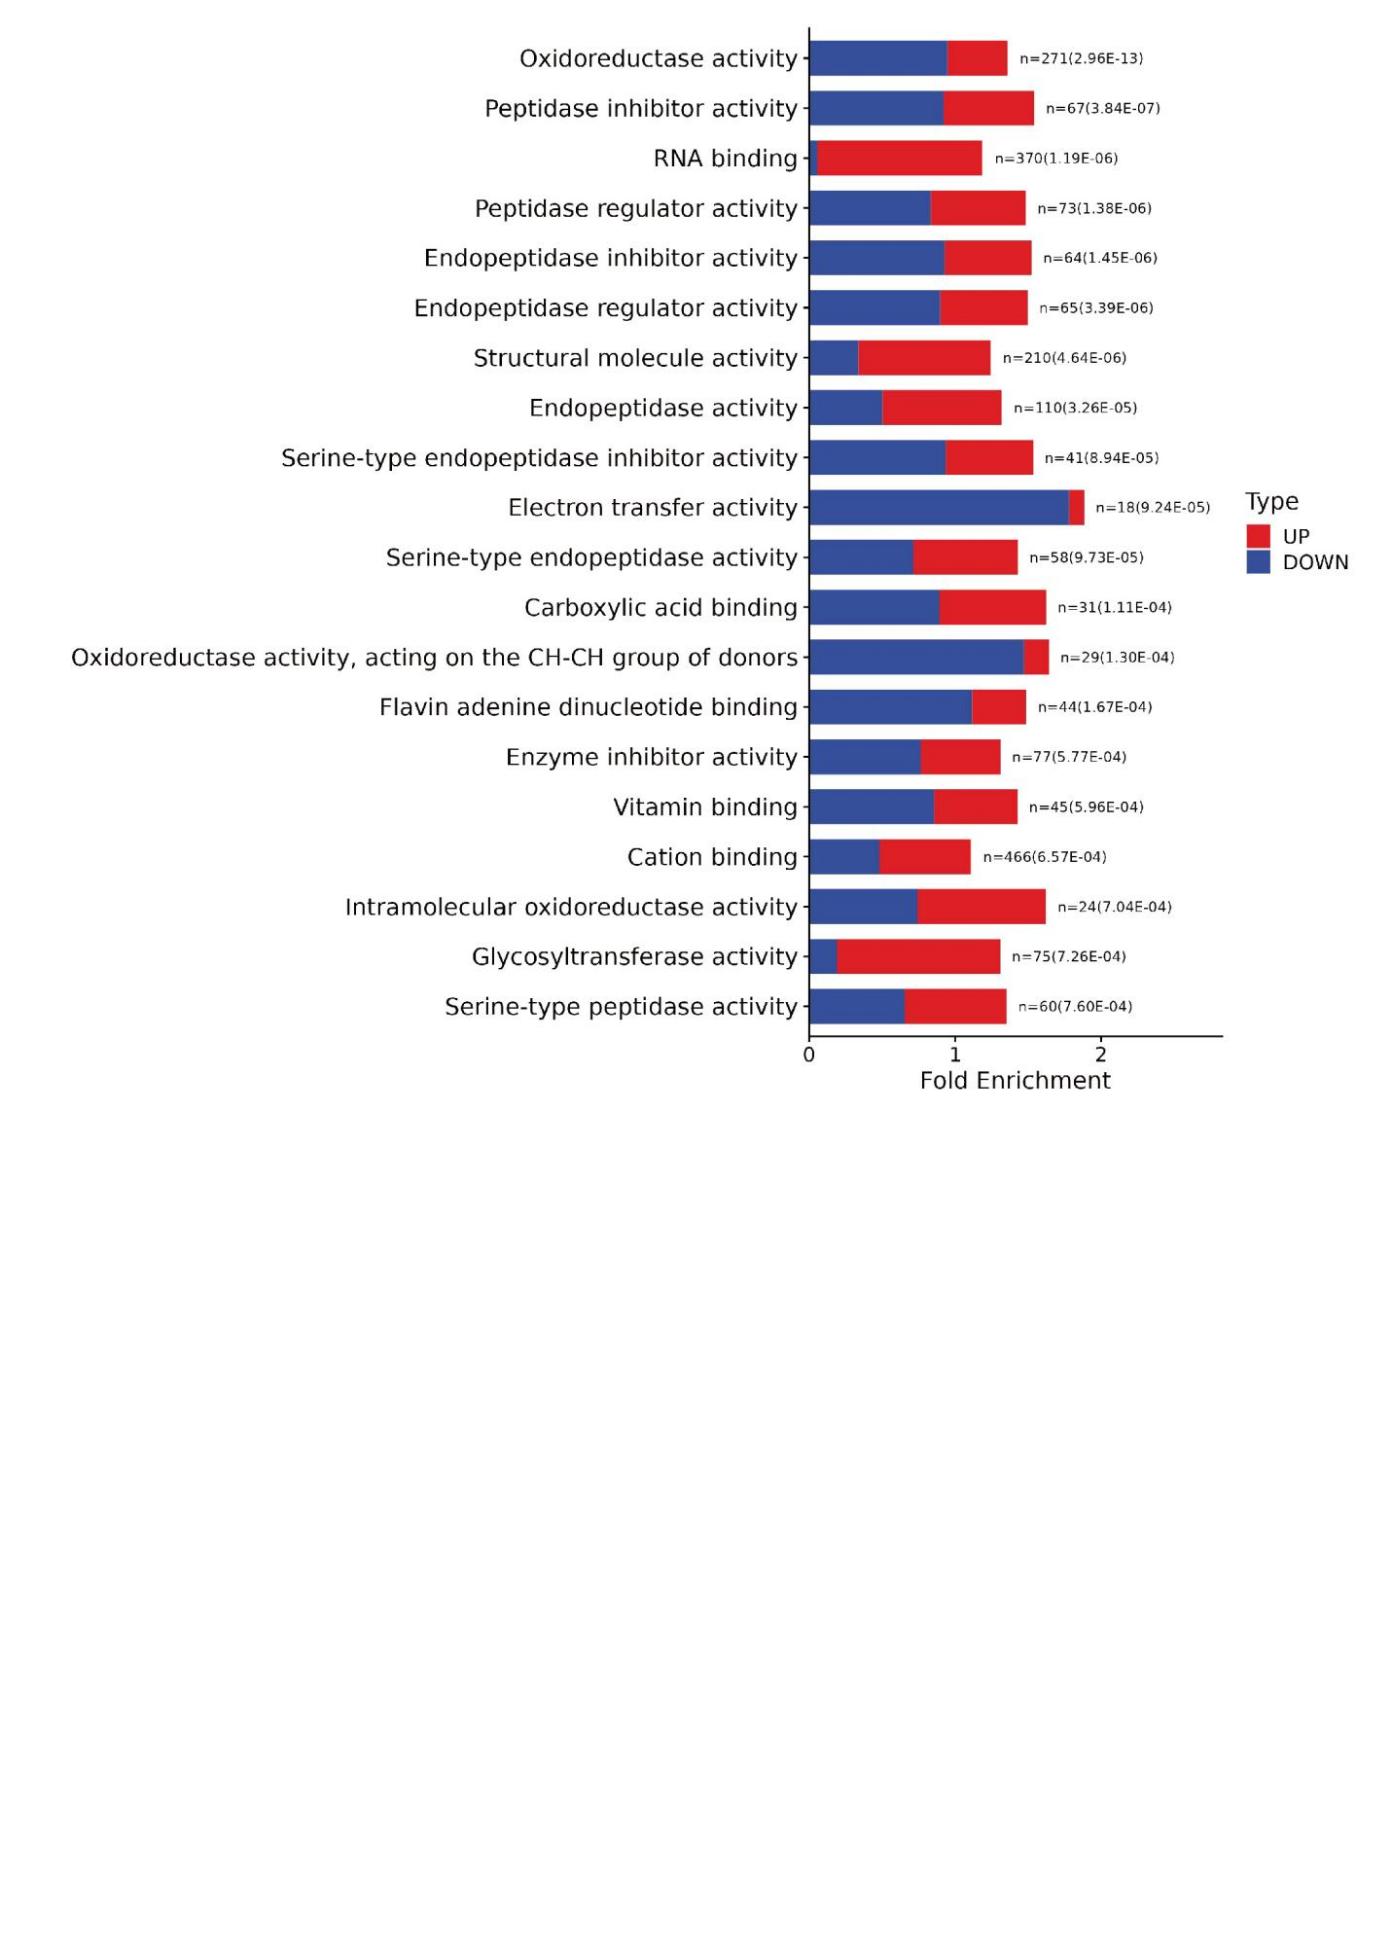


**Fig. S4. GO enrichment analysis of the macaque cSCC proteome.**


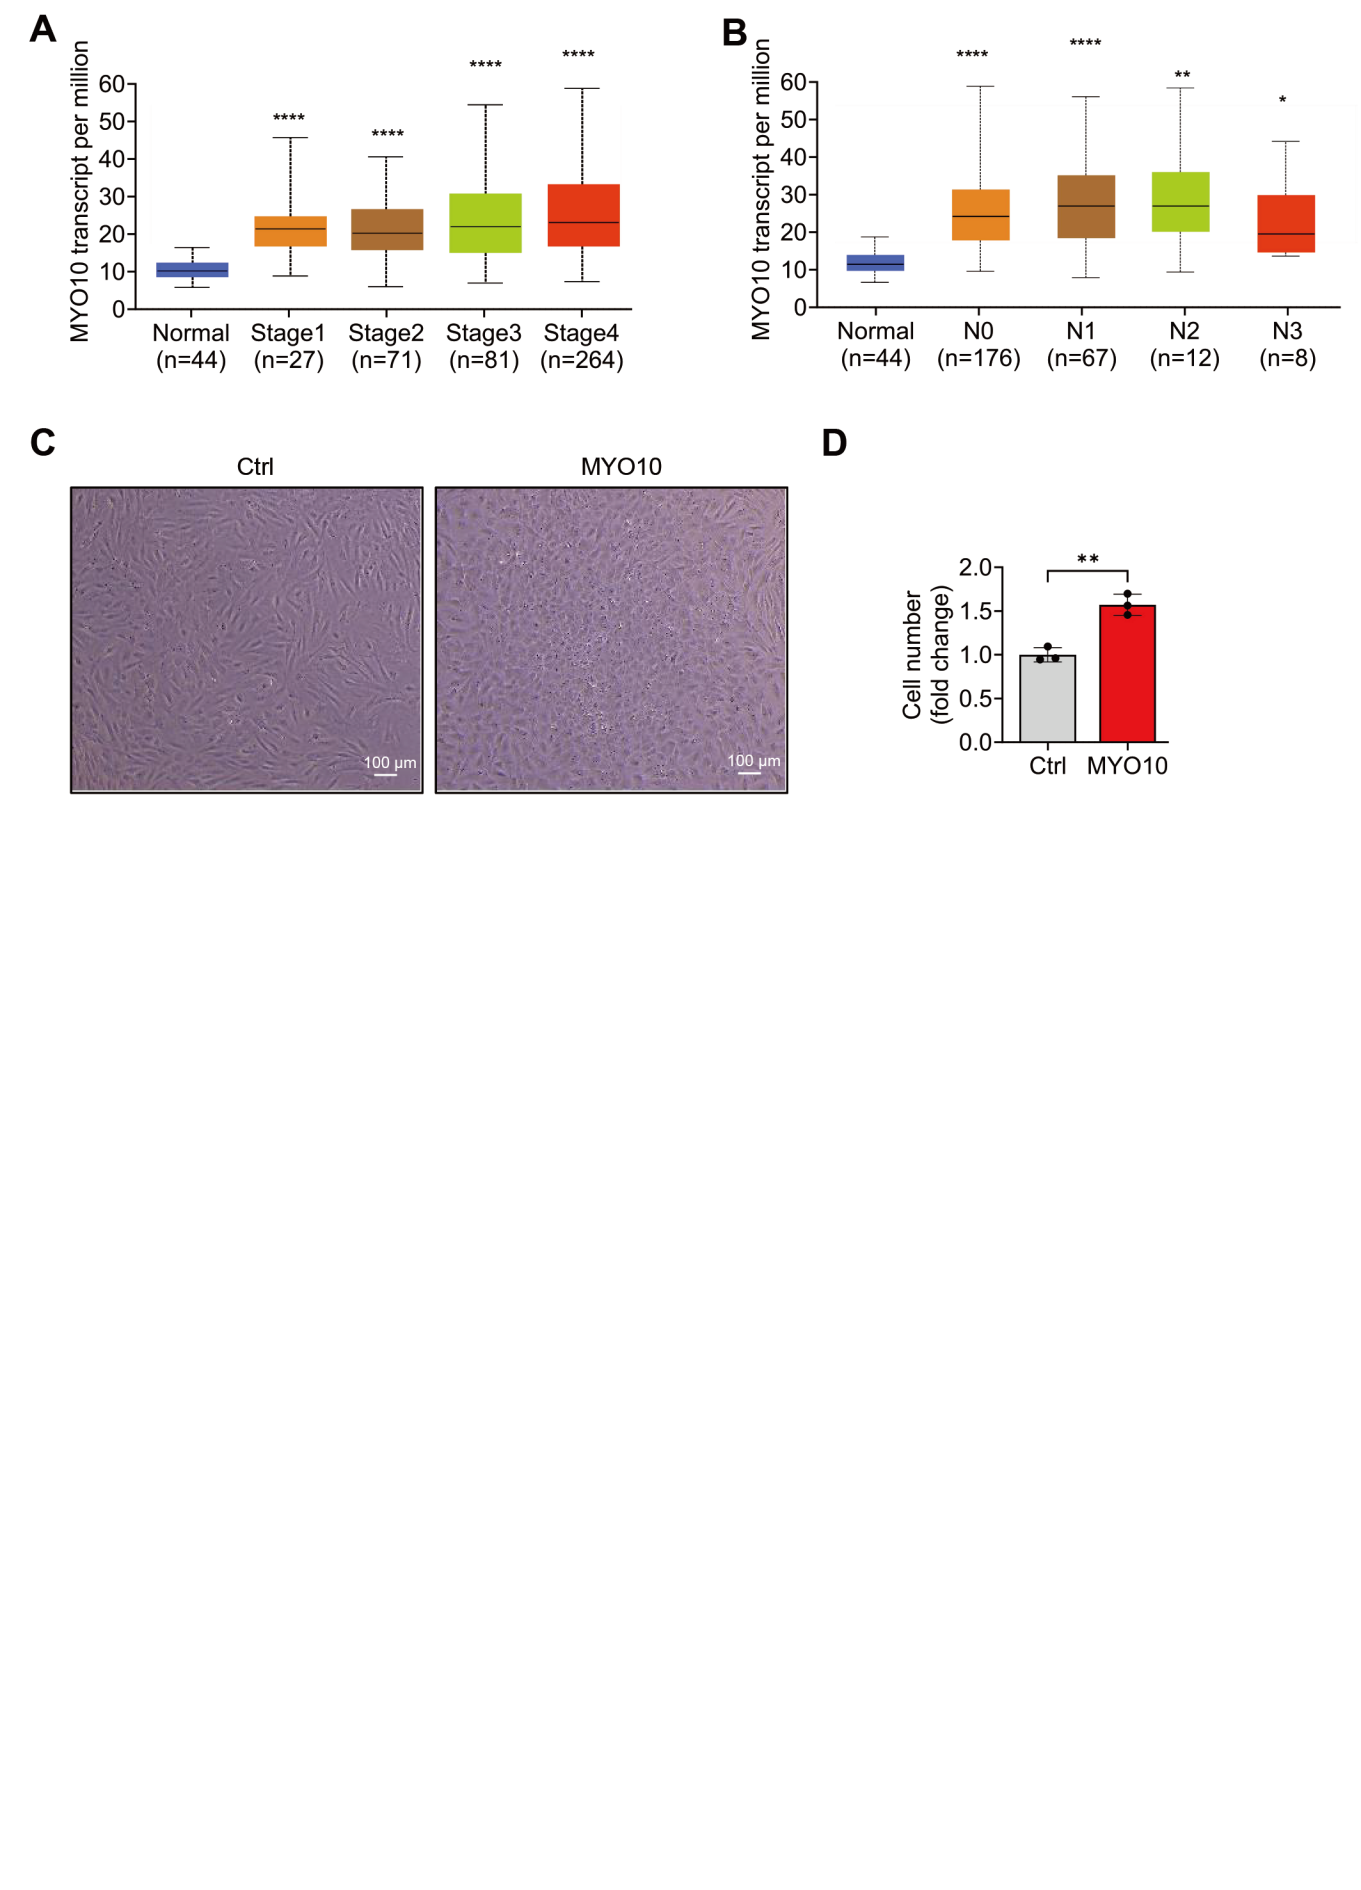


Fig. S5. Expression of MYO10 in head and neck squamous cell carcinoma (HNSC) and its functional impact. (A) Expression of *MYO10* in HNSC based on individual cancer stages. (B) mRNA expression of *MYO10* in HNSC based on nodal metastasis status. (C and D) Effects of MYO10 overexpression on the morphology and proliferation of HDF cells. HDF: human dermal fibroblasts. Scale bar: 100 μm.


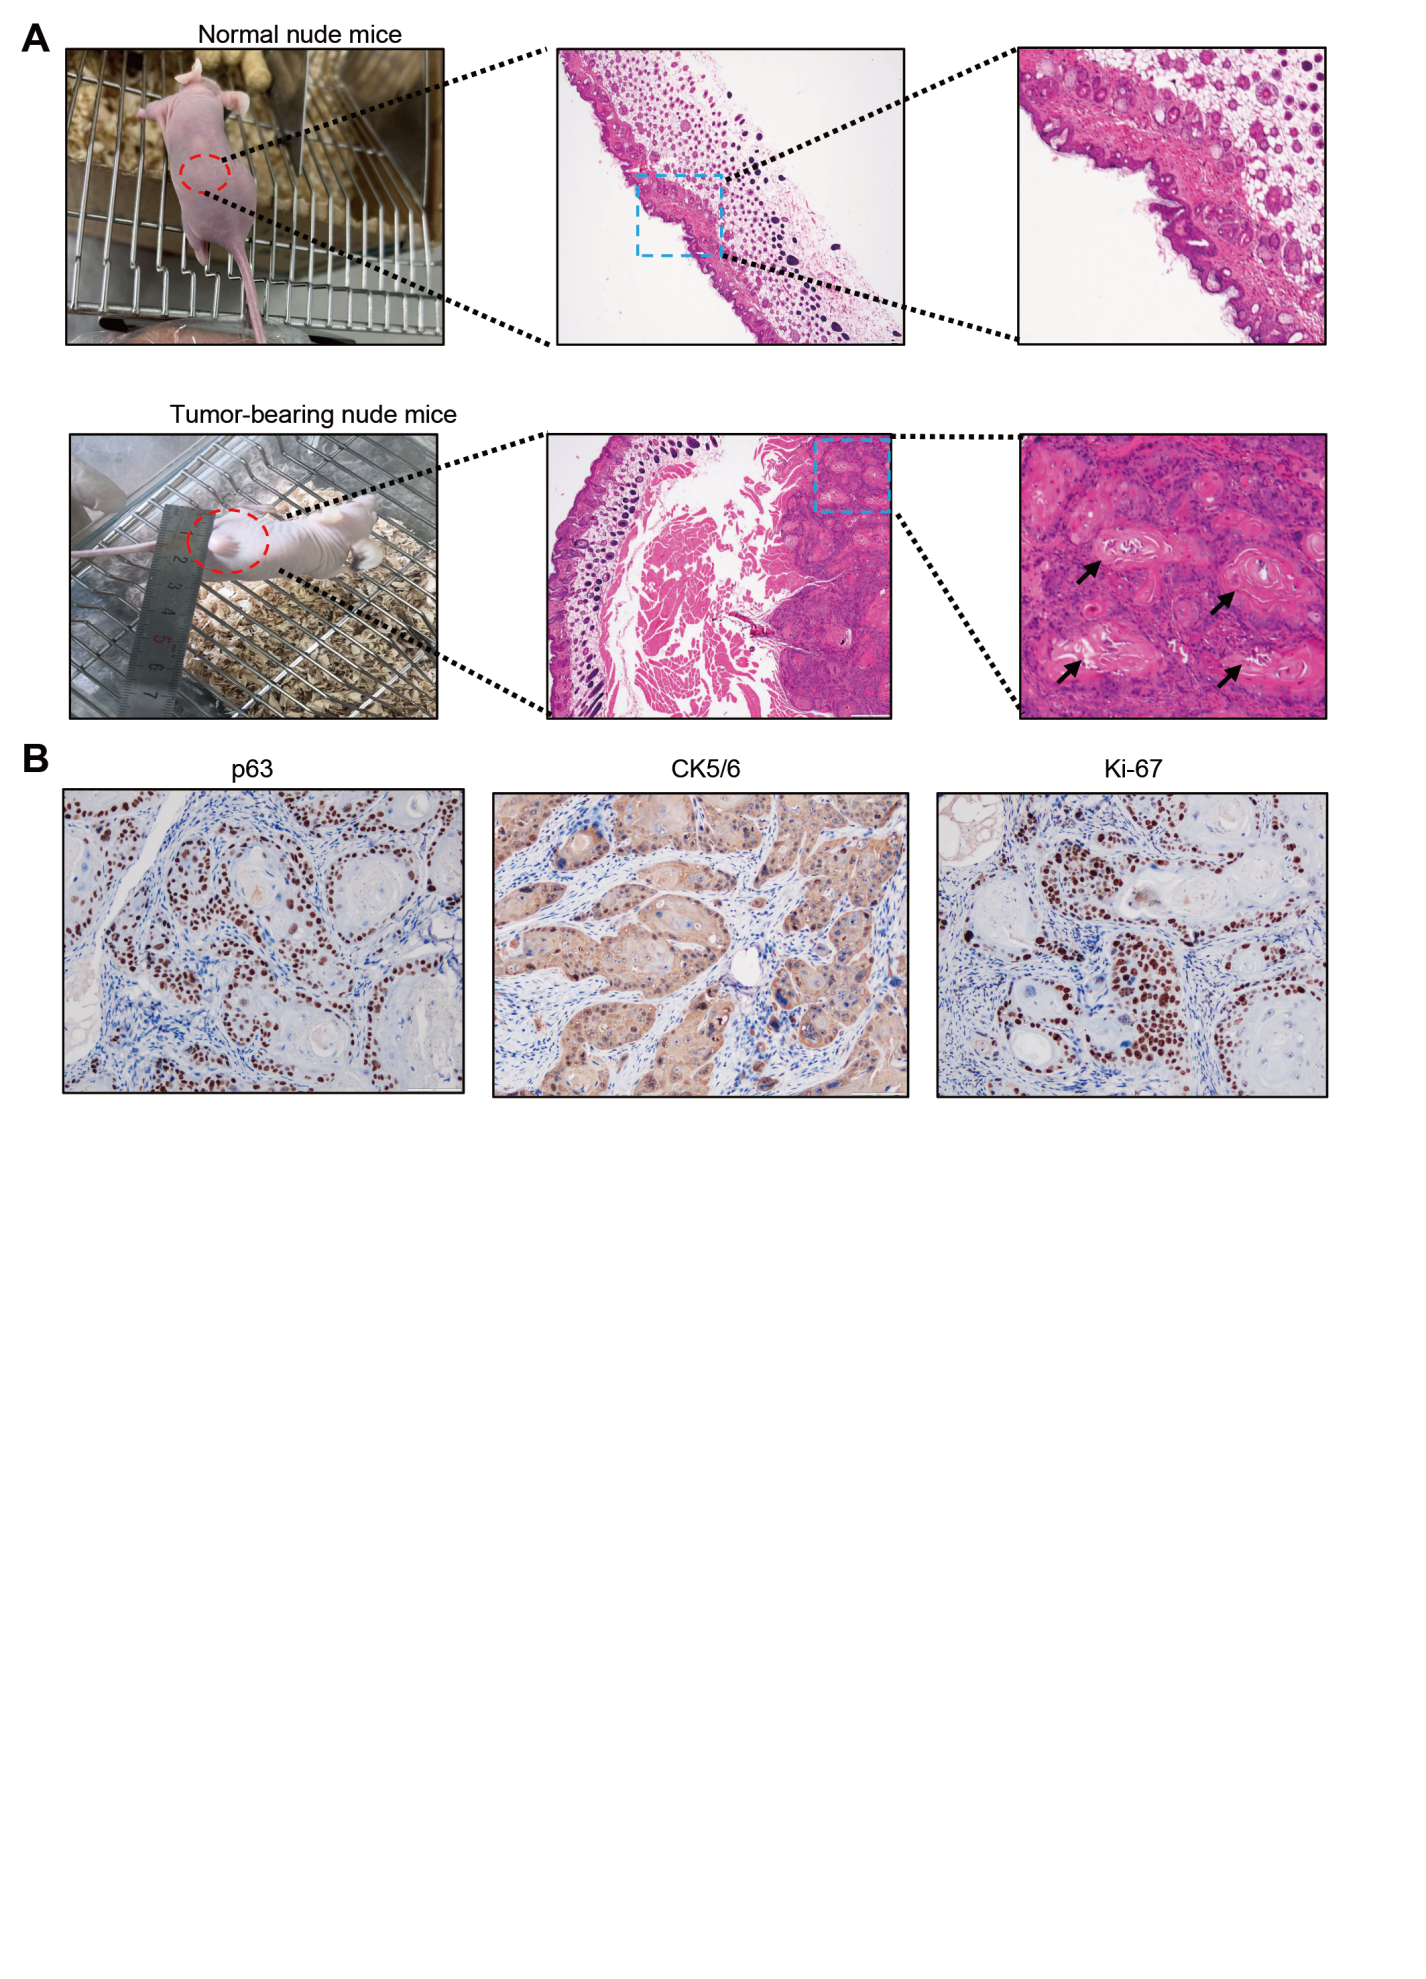


**Fig. S6. Paclitaxel treatment and its effects on tumor development in nude mice.** (**A**) H&E staining of tumor developed in nude mice. Black arrow indicates keratin pearl, a characteristic feature of squamous cell carcinoma. Scale bar: 100 μm. (**B**) IHC detection of p63, CK5/6, and Ki67 in transplanted tumors in nude mice. Scale bar: 100 μm.


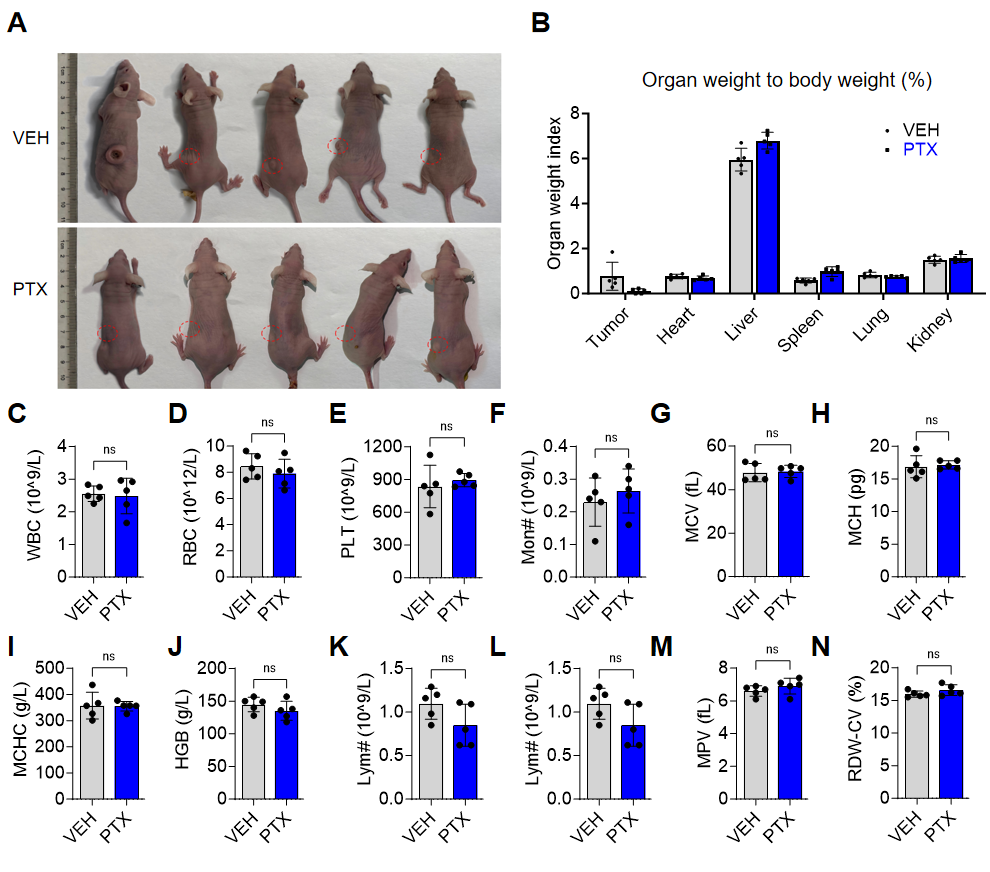


Fig. S7. Paclitaxel treatment and its effects on tumor development in nude mice. (A) Macroscopic views of xenograft tumors from mice treated with vehicle or paclitaxel, illustrating the impact of treatment on tumor size. (B) Organ weight measurements in nude mice after paclitaxel treatment. Data are expressed as mean ± SEM (n = 5 mice per group). No significant differences were observed. (C to N) Blood routine examination indicators of nude mice after paclitaxel treatment. No significant differences were observed.


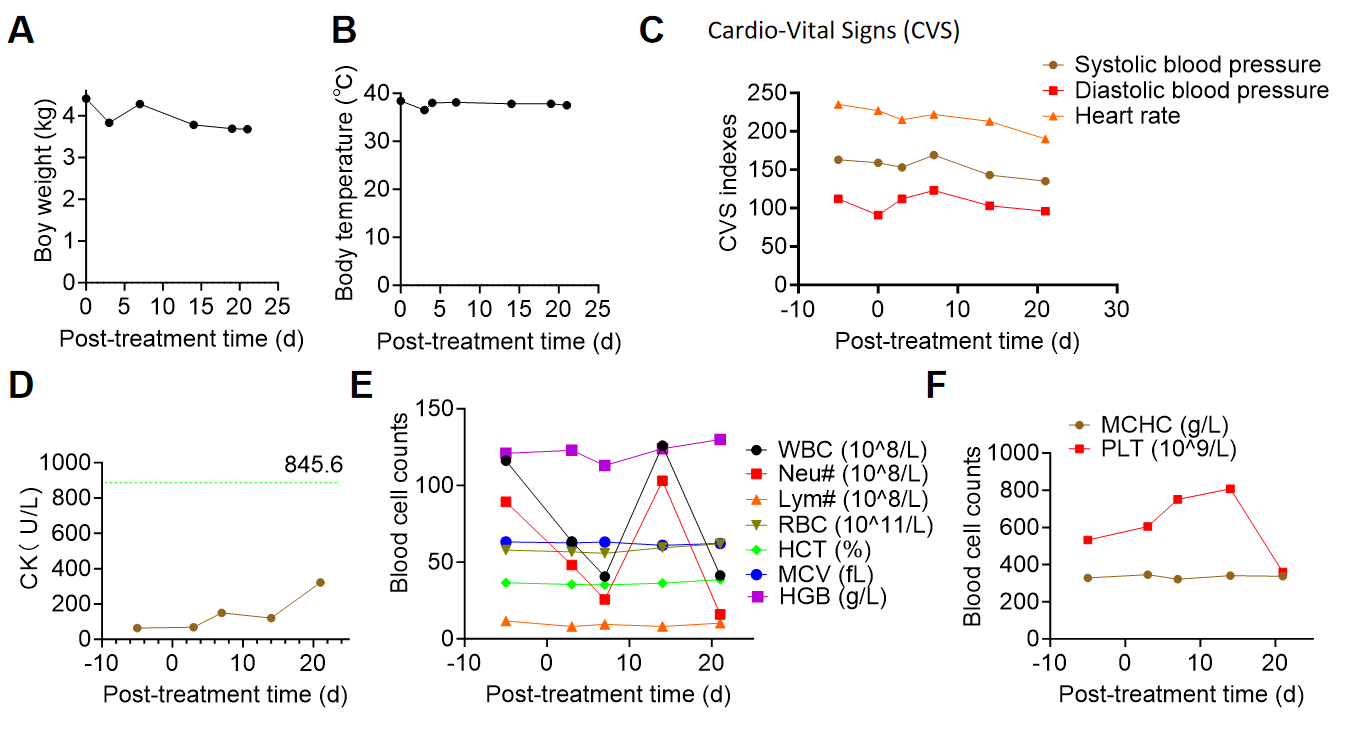


Fig. S8. Systemic safety and tolerability of paclitaxel treatment in a macaque model. (A) Body weight of the rhesus macaque before and after treatment initiation. A slight decrease was observed following paclitaxel administration, though substantial weight loss had already occurred before treatment. (B) Body temperature recordings throughout the treatment period. No obvious variations were detected. (C) Cardiovascular vital signs (CVS) were monitored during treatment. All parameters remained stable with no notable changes. (D) Serum creatine kinase (CK) levels following paclitaxel treatment. Values remained within the normal reference range for rhesus macaques (116.00–845.60 U/L), despite a mild elevation post-treatment. (E and F) Hematological parameters were assessed after paclitaxel administration. All blood cell counts remained within normal physiological ranges.

| **Table S1. Epidemiological characteristics of affected macaques.** | | | | | |
| --- | --- | --- | --- | --- | --- |
| **Gender** | **Total macaques (n)** | **Affected (n)** | **Deaths (n)** | **Incidence rate  (per million)** | **Mortality rate  (per million)** |
| Female | 1553 | 4 | 3 | 2575.66 | 1931.75 |
| Male | 1199 | 1 | 1 | 834.03 | 834.03 |
| Total | 2752 | 5 | 5 | 1816.86 | 1453.49 |

| **Table S2. Timeline from tumor onset to death for macaques with spontaneous cSCC.** | | | | |
| --- | --- | --- | --- | --- |
| **Macaque ID** | **Date of onset** | **Age at onset (year, human-equivalent*)** | **Date of death** | **Time from diagnosis to death (d)** |
| 07350 | 2022.01.08 | 52.5 | 2022.09.05 | 241 |
| 07090 | 2024.10.21 | 59.5 | 2024.12.03 | 44 |
| 11454 | 2023.10.09 | 42 | 2024.01.30 | 114 |
| 14397 | 2022.10.28 | 28 | 2023.01.04 | 68 |
| 14422 | 2024.04.10 | 35 | 2024.09.20 | 164 |

*Human-equivalent age was calculated by multiplying macaque age by 3.0.

Table S3. List of qPCR primers used in this study.

| **Primers** | **Sequence (5' to 3')** |
| --- | --- |
| rATM-F | ATTTGCTGCCGTCAACTAGAA |
| rATM-R | GATCTCGAATCAGGCGCTTAAA |
| rATR-F | GGCCAAAGGCAGTTGTATTGA |
| rATR-R | GTGAGTACCCCAAAAATAGCAGG |
| rIL6-F | ACTGACCTCTTCAGAACGAATTG |
| rIL6-R | CCTGAACCTTCCAAAGATGGCTG |
| rTNF-α-F | CCCCTCTCTAATCAGCCCTCTG |
| rTNF-α-R | GAGGACCTGGGAGTAGATGAG |

Table S4. Antibodies used in this study.

| **Name in this article** | **Product name** | **Experiment** | **Manufacturer information** | **Item number** | **Dilution ratio** |
| --- | --- | --- | --- | --- | --- |
| Caspase-3 | Caspase-3 Rabbit mAb | WB | Abclonal, Wuhan, China | A19654 | 1:1000 |
| cCaspase3 | Cleaved Caspase-3 (Asp175) Antibody | WB | Cell Signaling Technology, MA,USA | 9661S | 1:1000 |
| PARP/cPARP | PARP Antibody | WB | Cell Signaling Technology, MA, USA | 9542S | 1:1000 |
| β-actin | β-Actin Rabbit Monoclonal Antibody | WB | Beyotime, Tianjin, China | AF5003 | 1:1000 |
| γ-H2AX | Phospho-Histone H2AX-S139 Rabbit mAb | WB | Abclonal, Wuhan, China | AP0687 | 1:1000 |
| MYO10 | MYO10 Rabbit Polyclonal Antibody | WB | Huabio, Shanghai, China | ER60875 | 1:1000 |
| P-p65 | NFκB-p65 (phospho Ser468) Polyclonal Antibody | WB | UpingBiO, Hangzhou, CHINA) | YP-Ab-01269 | 1:1000 |
| SCCA1 | Anti-SerpinB3/SCCA antibody | IF | Abcam，Cambridge, MA, USA | ab154971 | 1：100 |
| Ki67 | Anti-Ki67 antibody | IF | Abcam，Cambridge, MA, USA | ab245113 | 1：100 |
| CK | Anti-pan Cytokeratin antibody | IF | Abcam，Cambridge, MA, USA | ab7753 | 1：560 |
| Vimentin | Anti-Vimentin antibody | IF | Abcam，Cambridge, MA, USA | ab92547 | 1：250 |
| Goat Anti-Rabbit | Goat Anti-Rabbit IgG H&L | IF | Abcam，Cambridge, MA, USA | ab150079 | 1:200 |
| Goat Anti-Mouse | Goat Anti-Mouse IgG H&L | IF | Abcam，Cambridge, MA, USA | ab150113 | 1:200 |
| Ki67 | Anti-Ki67 antibody | IHC | MXB，Fuzhou，China | MXR002 | RTU |
| P63 | Anti-P63 antibody | IHC | MXB，Fuzhou，China | MX013 | RTU |
| CK5/6 | Anti-Cytokeratin5/6 antibody | IHC | MXB，Fuzhou，China | MX040 | RTU |
| MaxVision-HRP | MaxVision-HRP Mouse/Rabbit | IHC | MXB，Fuzhou，China | KIT-5030 | RTU |

RTU: Ready-to-Use.

**Uncropped Western blots for Fig. 4F**


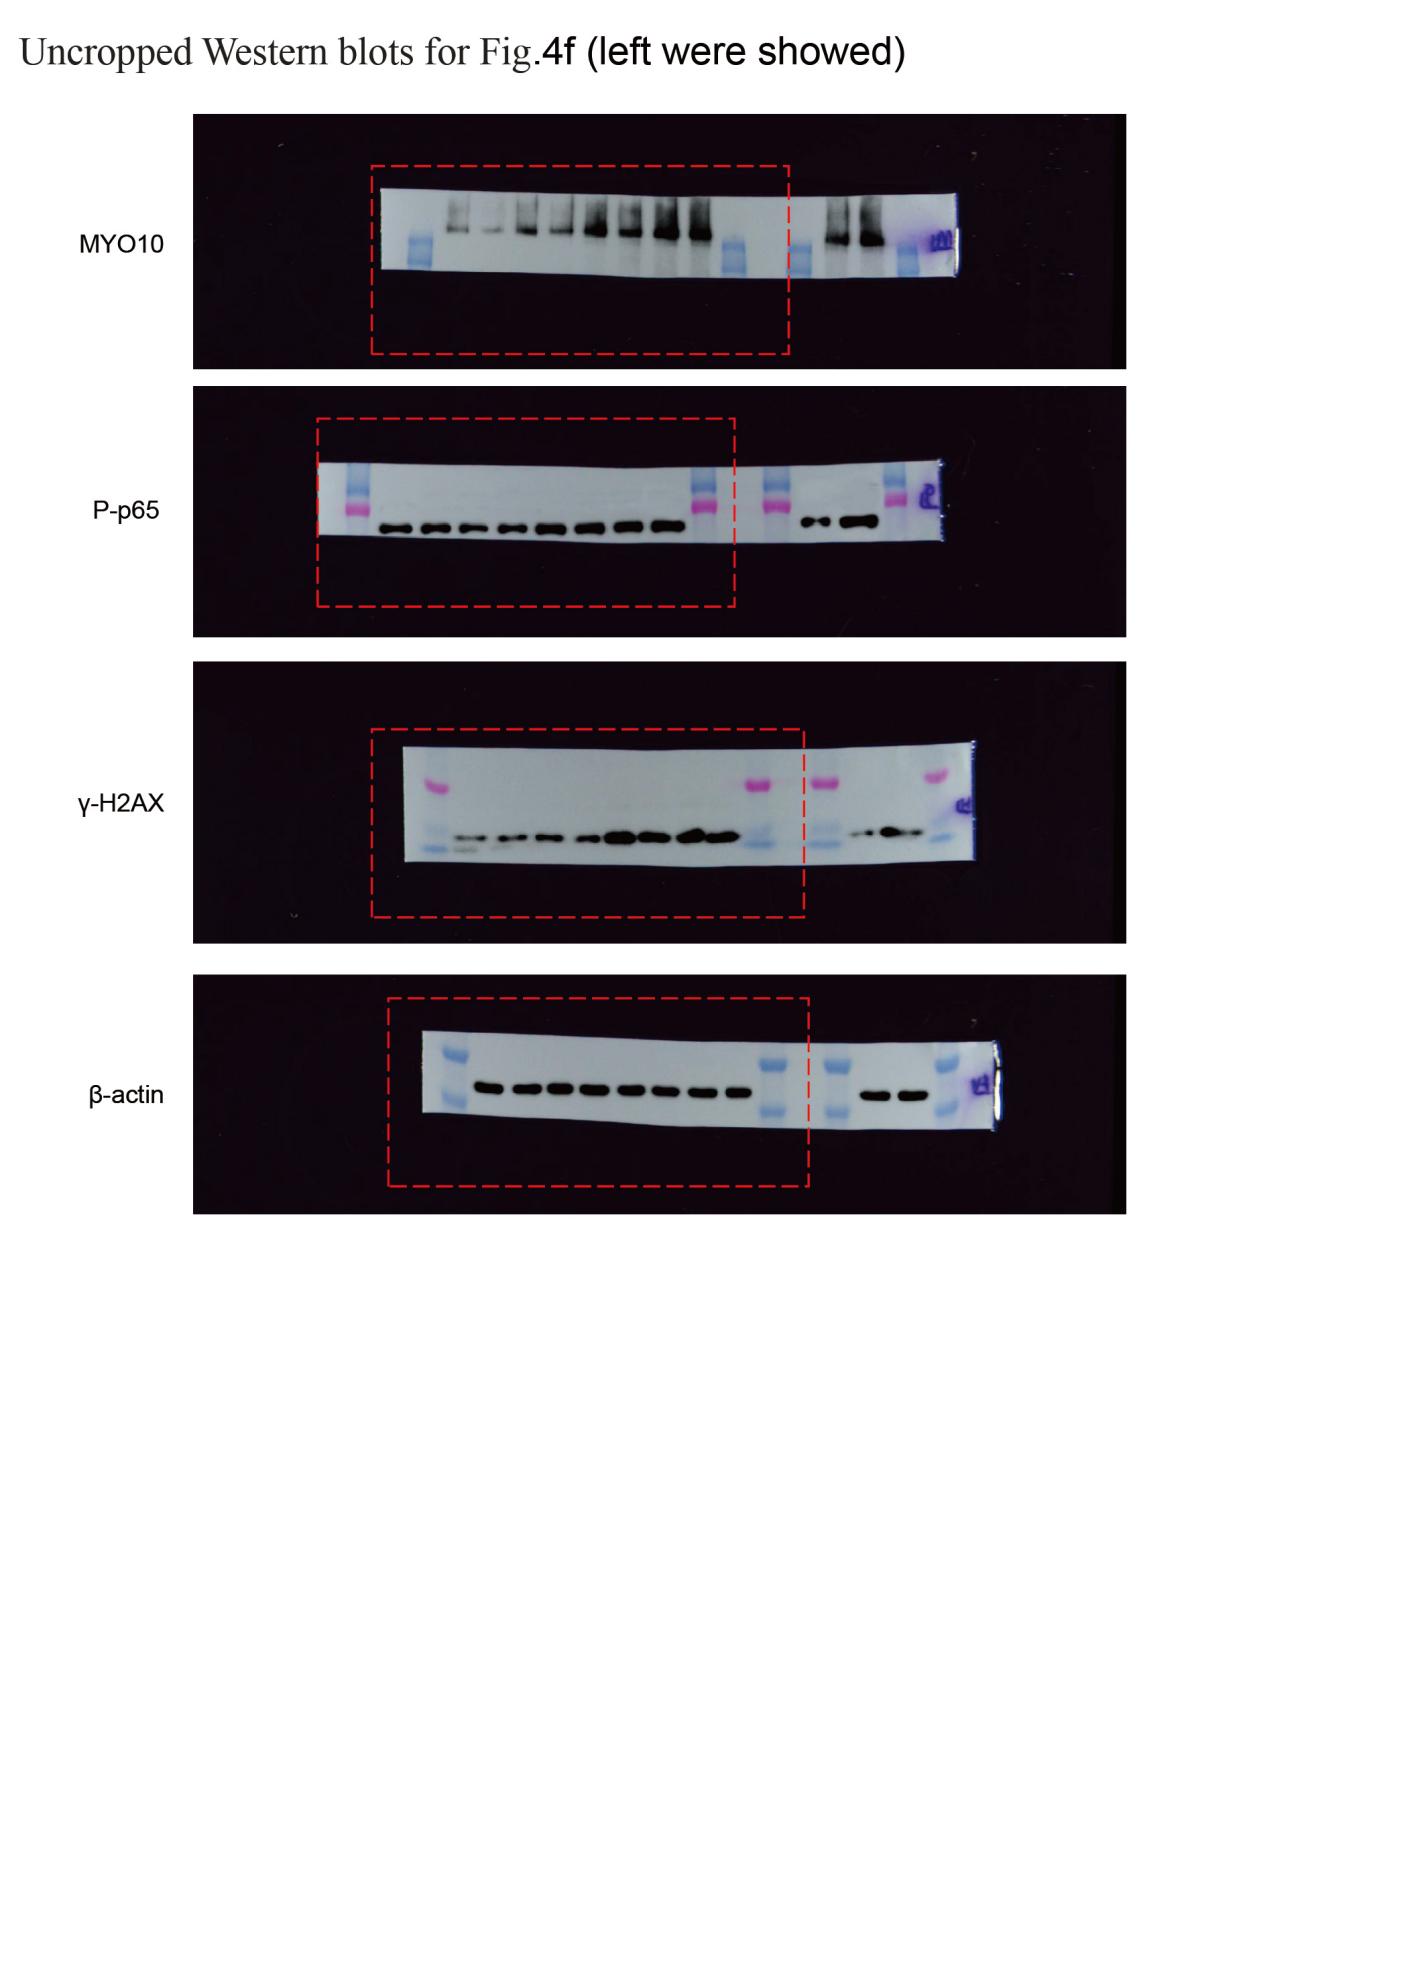


**Uncropped Western blots for Fig.5, A** and **I**
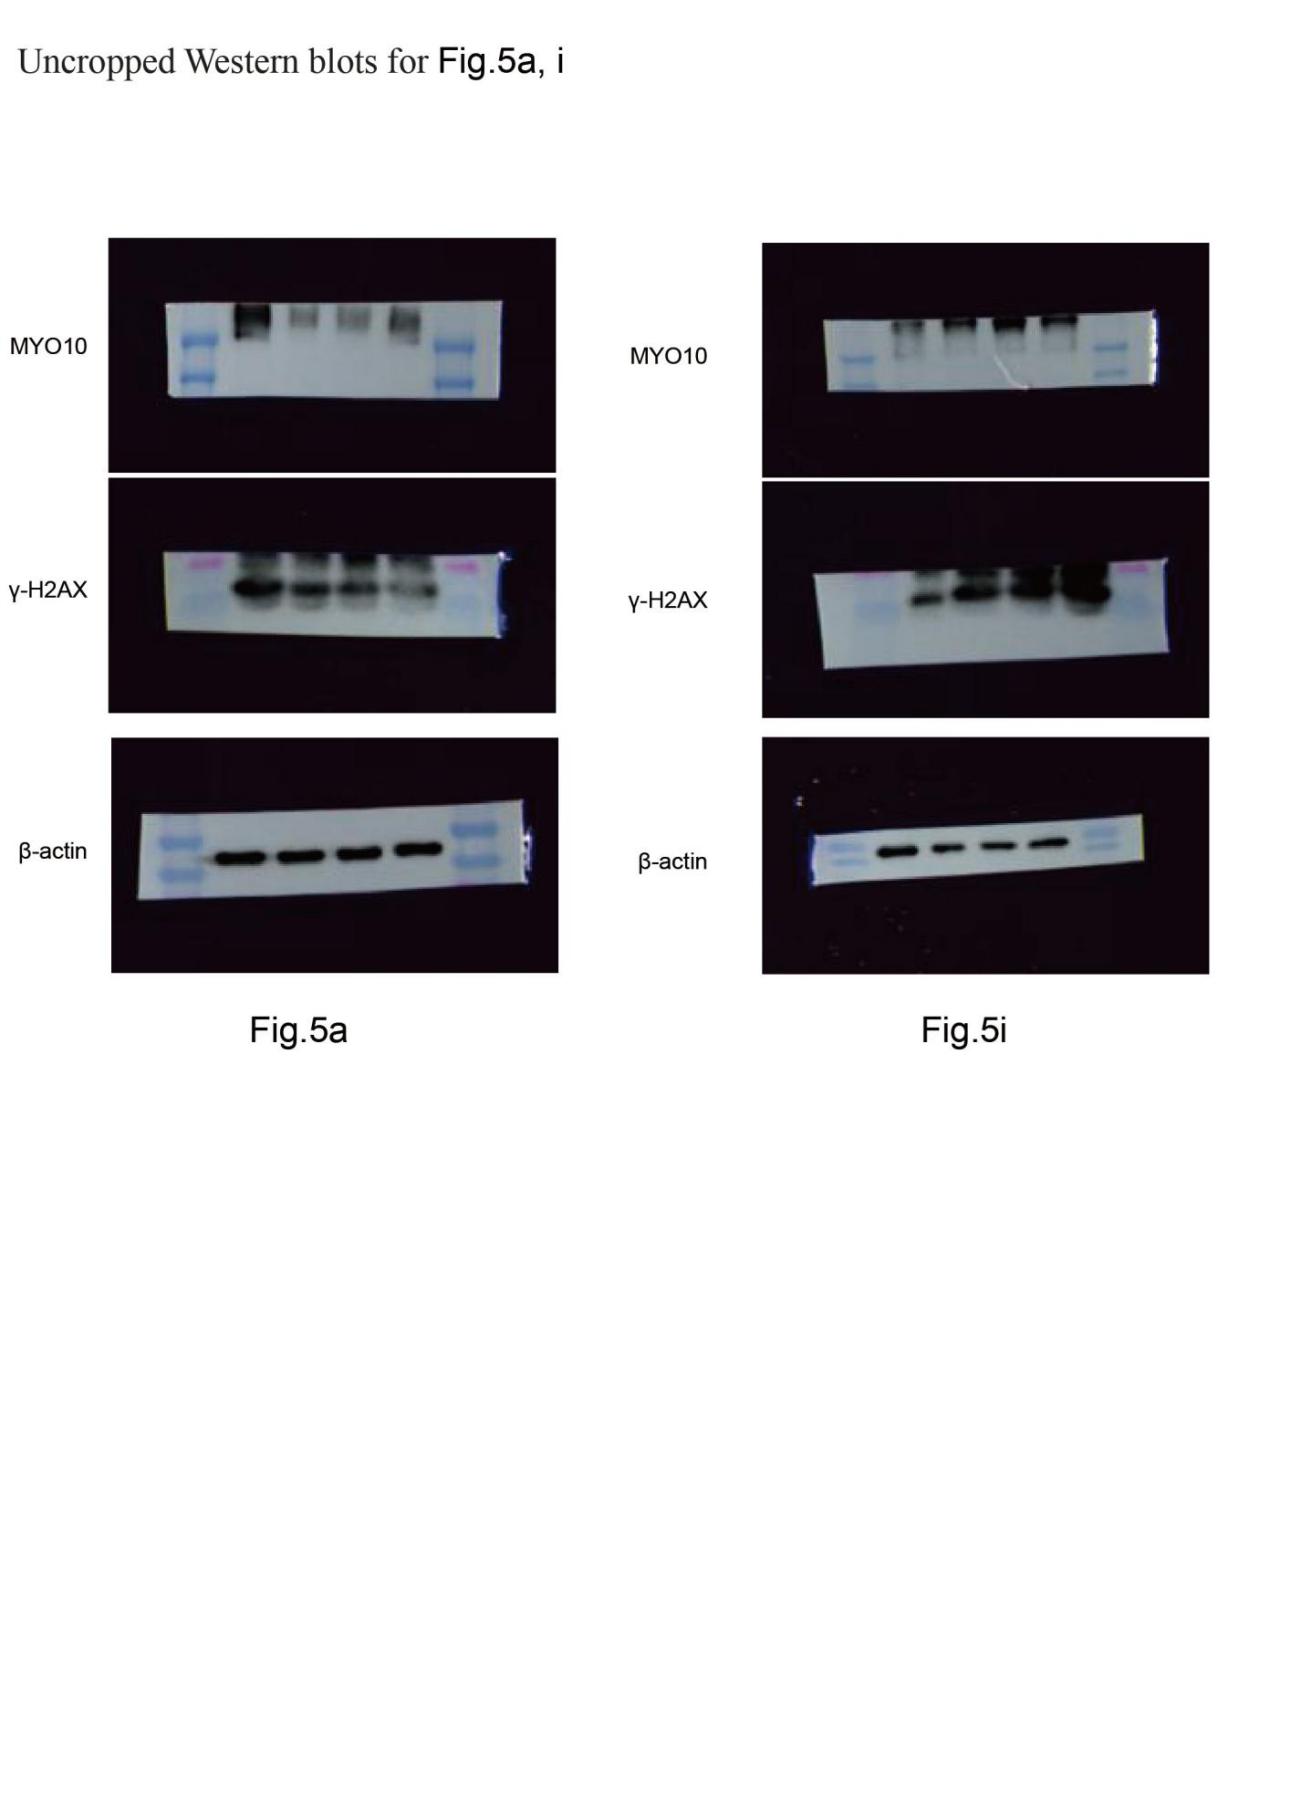


**Uncropped Western blots for Fig. 6E**

**
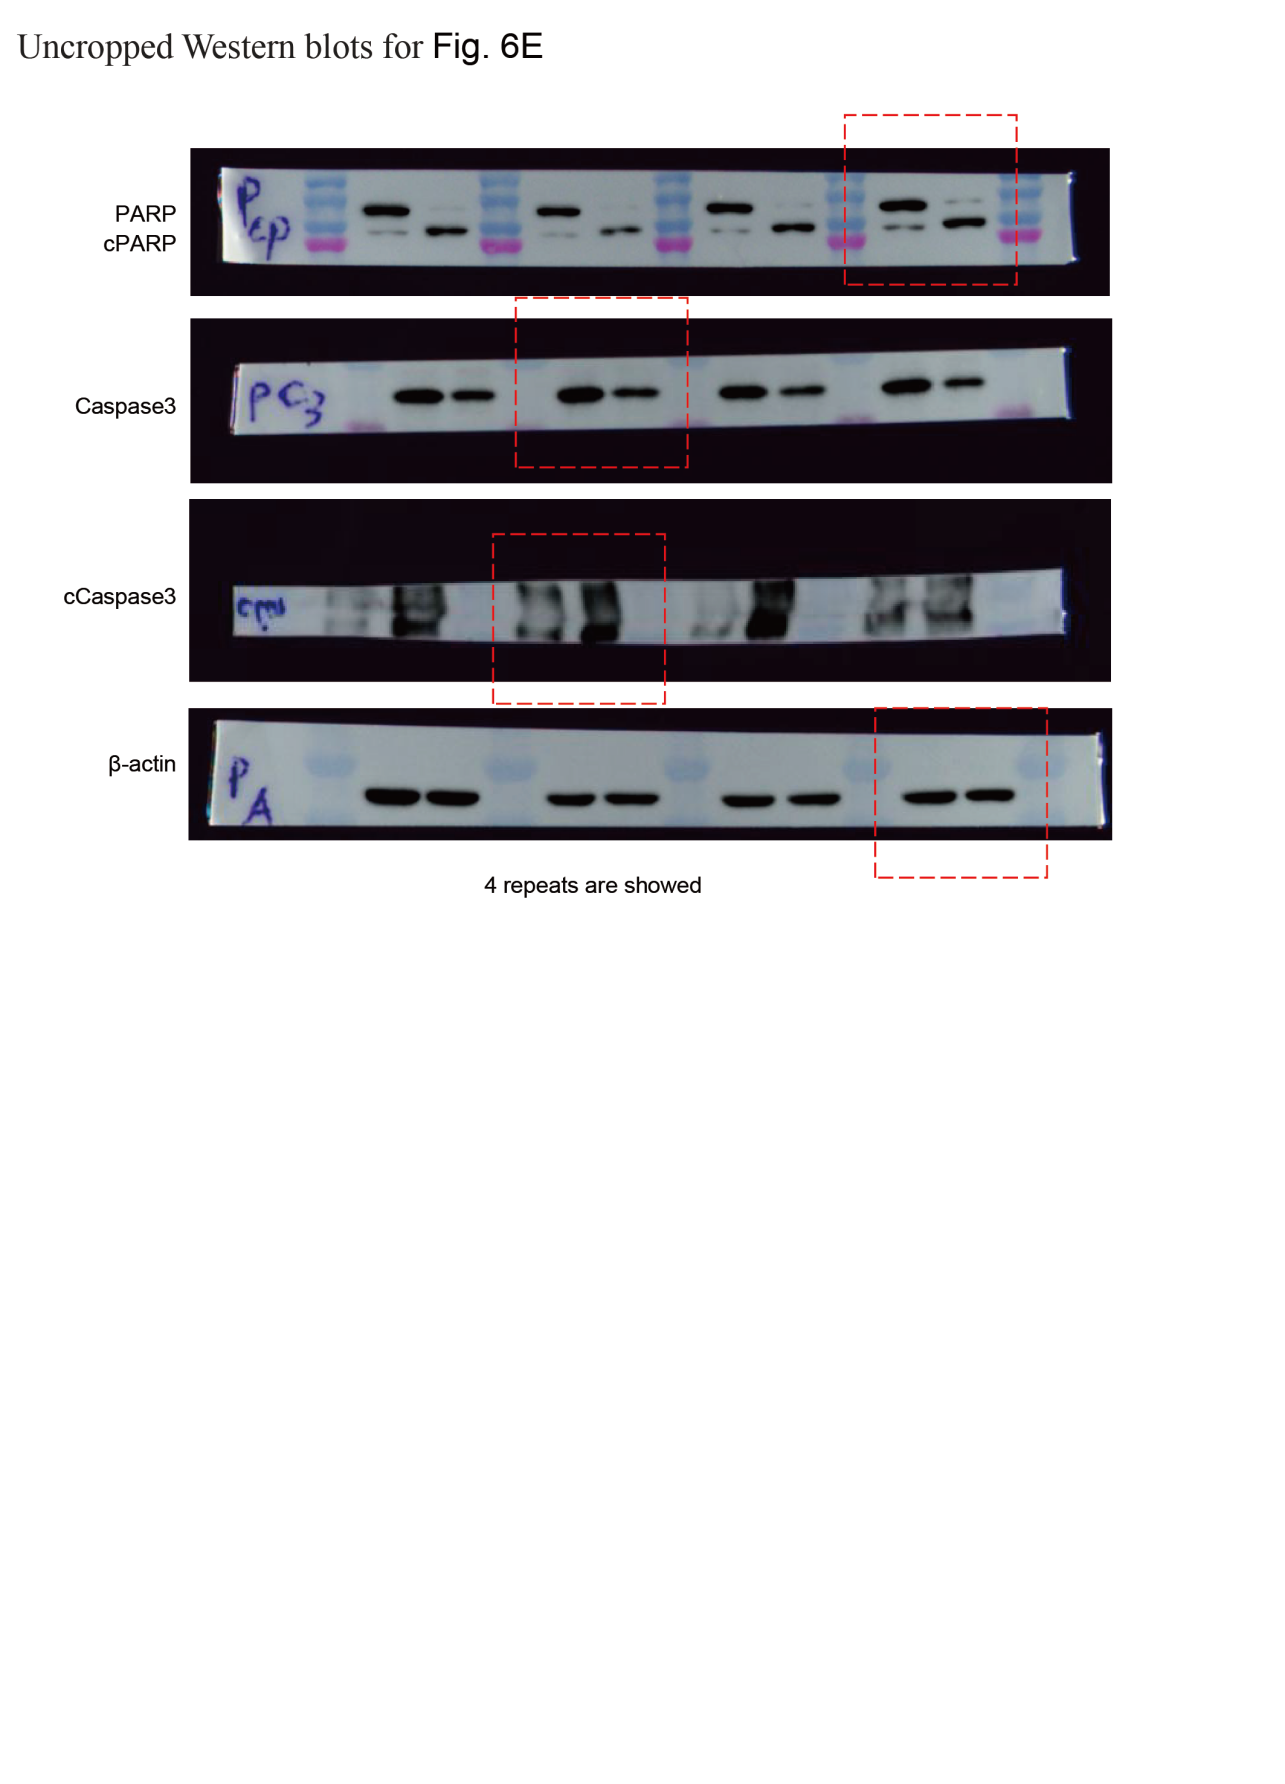
**

**Uncropped Western blots for Fig. 7F**


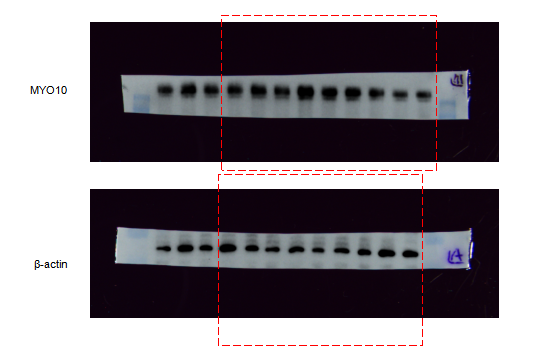


**Abbreviations**

cSCC: Cutaneous squamous cell carcinoma

UV: Ultraviolet

SNVs: Single-nucleotide variants

indels: Insertions and deletions

CNVs: Copy-number alterations

WGS: Whole-genome sequencing

ANT: Adjacent non-tumor tissues

ANT-C: Cells isolated from adjacent non-tumor tissues

MSCC: Macaque cutaneous squamous cell carcinoma (tissues)

MSCC-C: Macaque cutaneous squamous cell carcinoma cells

scRNA-seq: Single-cell RNA sequencing

UMAP: Uniform Manifold Approximation and Projection

DEGs: Differentially expressed genes

PCA: Principal component analysis

SNN: Shared nearest neighbor

qPCR: Quantitative Real-Time PCR

SASP: Senescence-associated secretory phenotype

RT: Reverse transcription

SDS-PAGE: Sodium dodecyl sulfate–polyacrylamide gel electrophoresis

PVDF: Polyvinylidene fluoride

TBS-T: Tris-buffered saline with Tween-20

H&E: Hematoxylin and eosin

DAB: 3,3′-diaminobenzidine

BSA: Bovine serum albumin

DAPI: 4′,6-diamidino-2-phenylindole

TUNEL: Terminal deoxynucleotidyl transferase dUTP nick end labeling

TdT: Terminal deoxynucleotidyl transferase

DIA: Data-independent acquisition

UHPLC: Ultra-high-performance liquid chromatography

MS1: Mass spectrometry level 1

SPF: Specific pathogen-free

IV: Intravenous

IM: Intramuscular

MRI: Magnetic resonance imaging

TR: Repetition time

TE: Echo time

ANOVA: Analysis of variance

SD: Standard deviation

SEM: Standard error of the mean

CK5/6: Cytokeratin 5/6

SCCA1: Squamous Cell Carcinoma Antigen 1

NF-κB: Nuclear factor kappa-light-chain-enhancer of activated B cells

HNSC: Head and neck squamous cell carcinoma

IC50: Half-maximal inhibitory concentration

VEH: Vehicle

ALT: Alanine aminotransferase

AST: Aspartate aminotransferase

CRE2: Creatinine

BUN: Blood urea nitrogen

CK: Creatine kinase

ELISA: Enzyme-linked immunosorbent assay

GO: Gene Ontology

KEGG: Kyoto Encyclopedia of Genes and Genomes

GSEA: Gene set enrichment analysis

ssGSEA: Single-sample gene set enrichment analysis

TCGA: The Cancer Genome Atlas
